# Supplementary material for: Increased Circulating Epithelial Tumor Cells (CETC/CTC) over the Course of Adjuvant Radiotherapy Is a Predictor of Less Favorable Outcome in Patients with Early-Stage Breast Cancer
Source: MDPI journal article supplement (doi:10.3390/curroncol30010021), 2022-12-24
Supplement: s1 [file s1]

## Supplementary Material

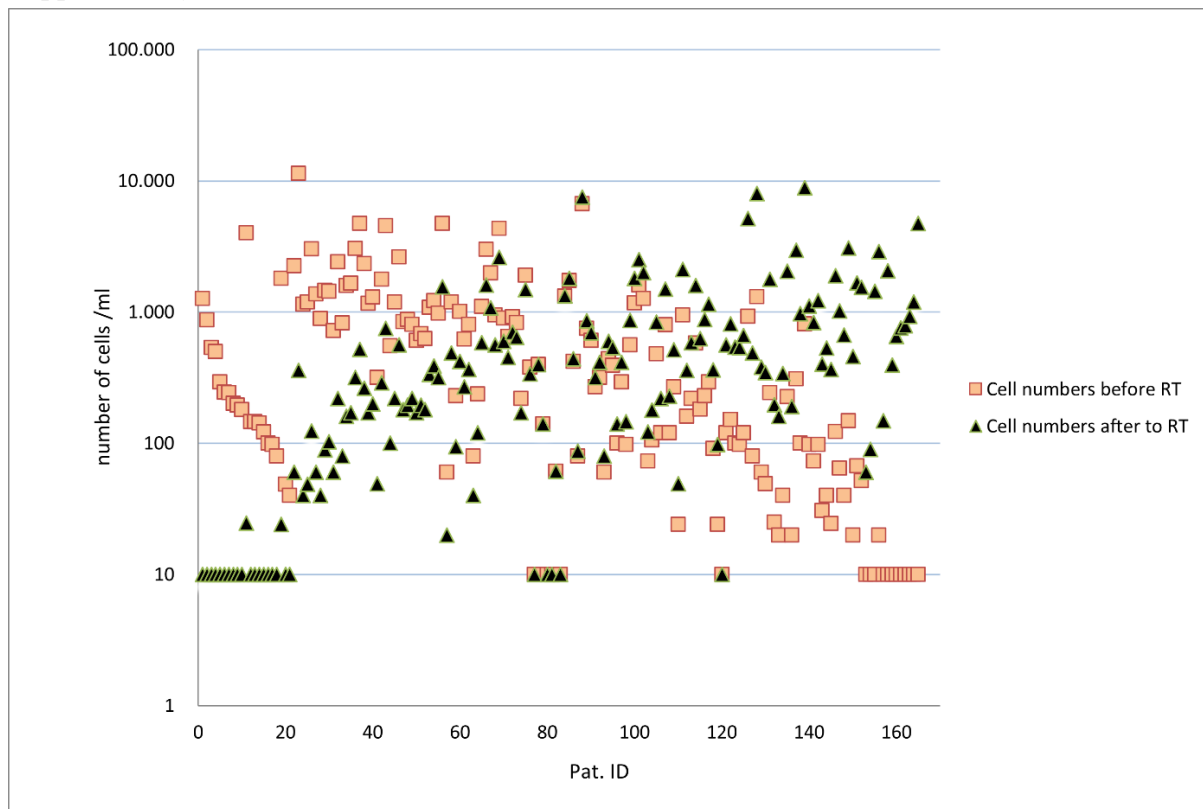

**Figure S1.** Absolute cell numbers before and after RT, sorted by quotient.

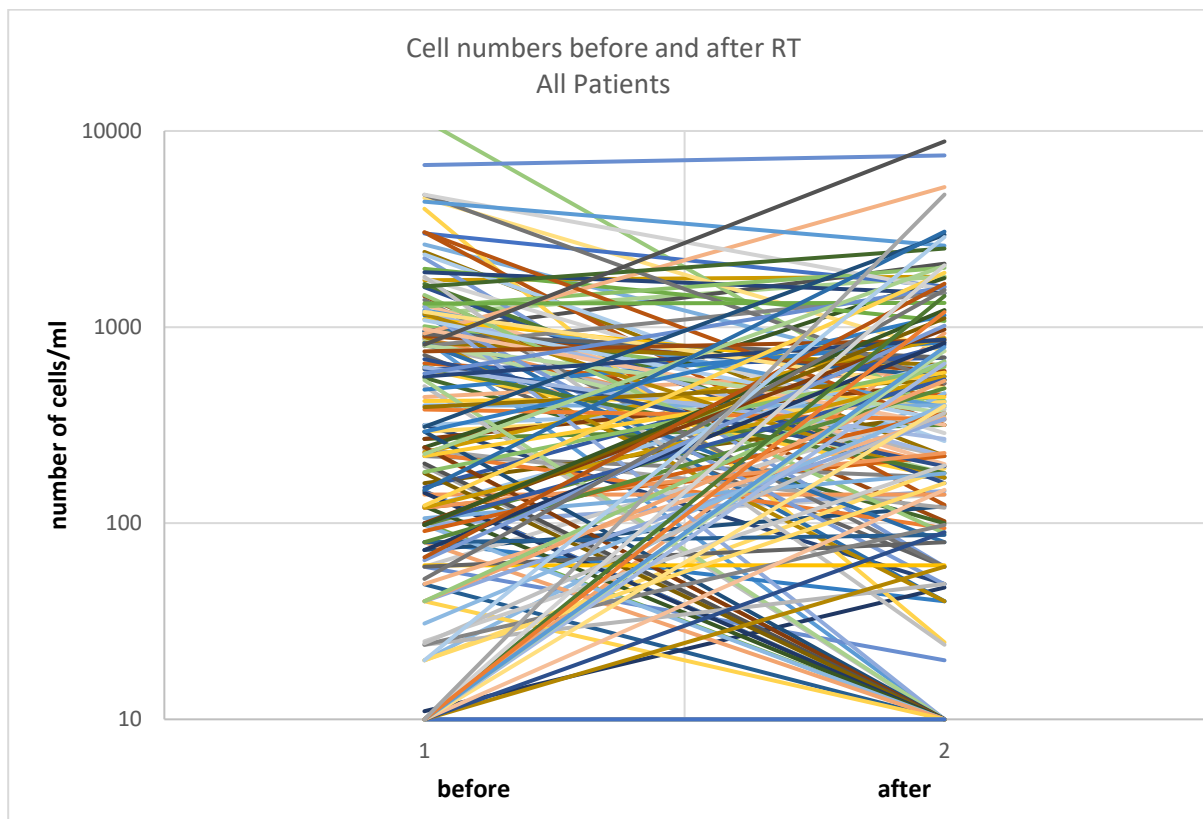

**Figure S2A.** Course of absolute cell counts before and after RT for all 165 patients.

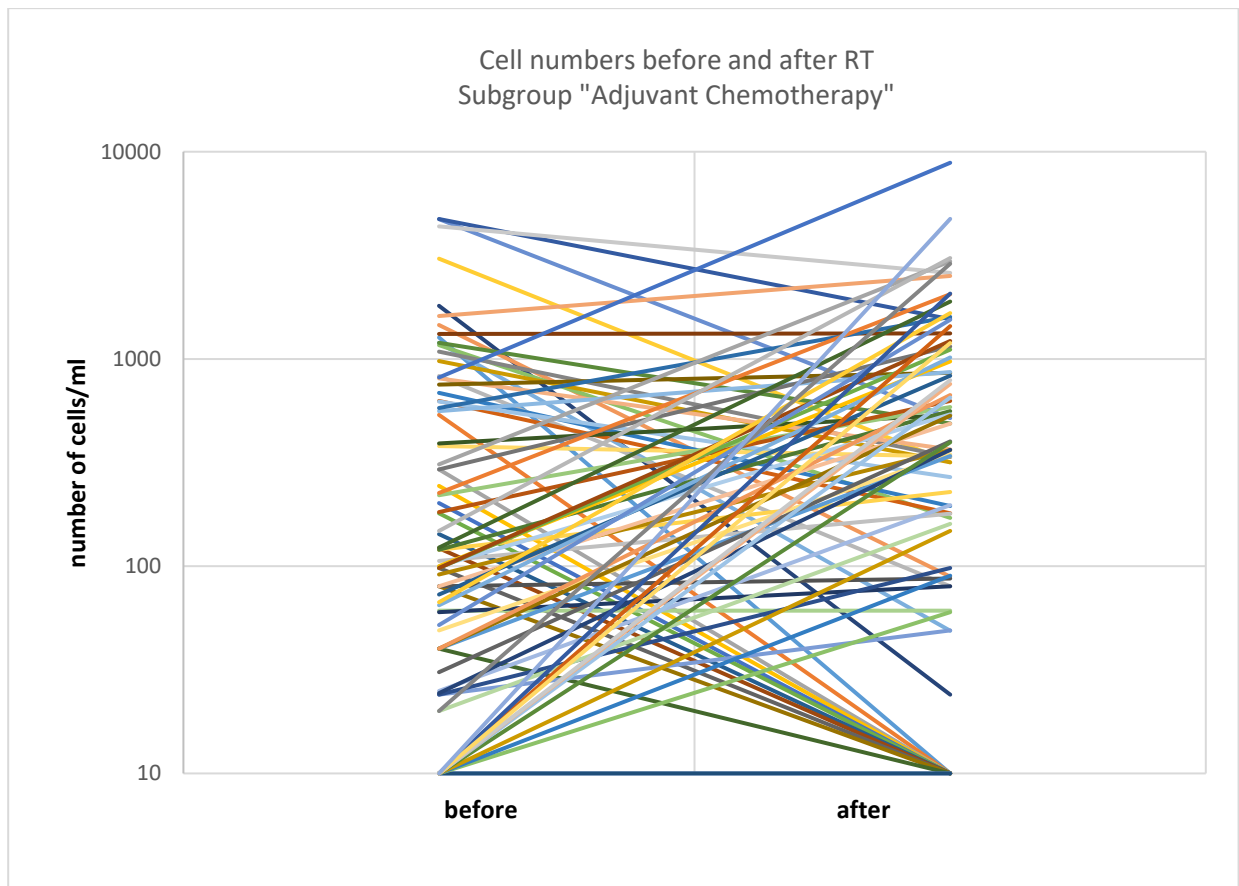

**Figure S2B.** Course of absolute cell counts before and after RT of patients who received adjuvant chemotherapy.

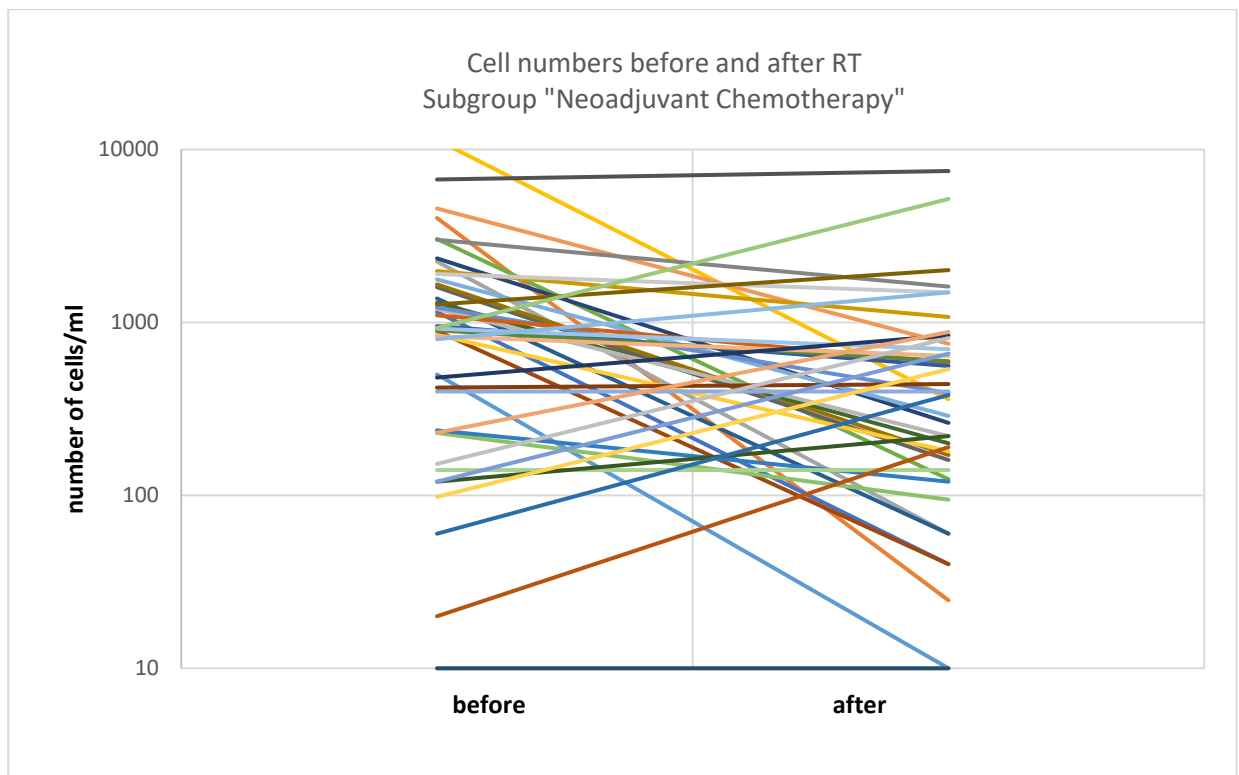

**Figure S2C.** Course of absolute cell counts before and after RT of patients who received neoadjuvant chemotherapy.

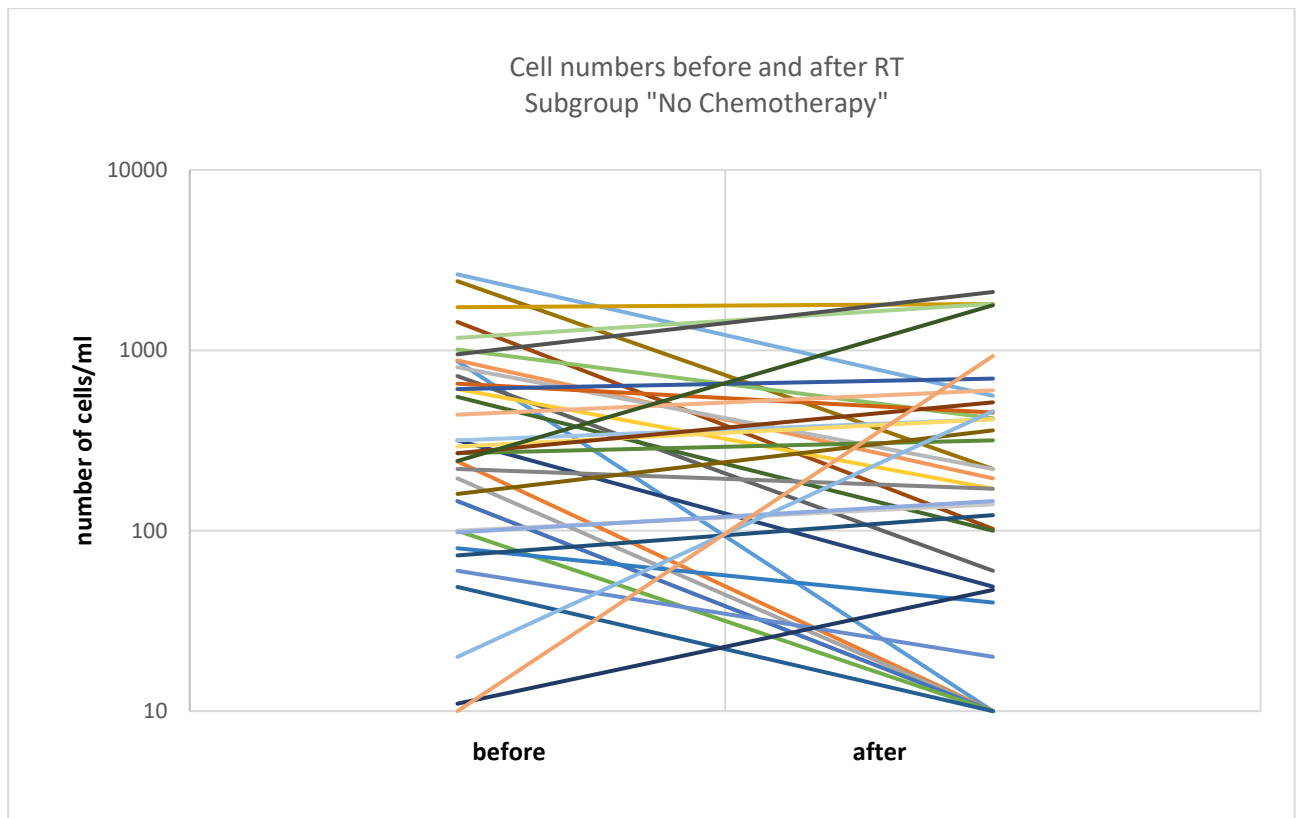

**Figure S2D.** Course of absolute cell counts before and after RT of patients who did not received chemotherapy.
